## Correction

# Correction: The Association of Depression and Anxiety with Pain: A Study from NESDA

**The PLOS ONE Staff**

In the Author Contributions section, Christina M. van der Feltz-Cornelis (CMFC) should be listed as one of the persons who analyzed the data.

**Reference**

1. de Heer EW, Gerrits MMJG, Beekman ATF, Dekker J, van Marwijk HWJ, et al. (2014) The Association of Depression and Anxiety with Pain: A Study from NESDA. PLoS ONE 9(10): e106907. doi:10.1371/journal.pone.0106907

---

**Citation:** The PLOS ONE Staff (2014) Correction: The Association of Depression and Anxiety with Pain: A Study from NESDA. PLoS ONE 9(12): e115077. doi:10.1371/journal.pone.0115077

**Published:** December 1, 2014

**Copyright:** © 2014 The PLOS ONE Staff. This is an open-access article distributed under the terms of the Creative Commons Attribution License, which permits unrestricted use, distribution, and reproduction in any medium, provided the original author and source are credited.
